# Supplementary material for: Inhibition of Eukaryotic Translation Initiation Factor 5A (eIF5A) Hypusination Suppress p53 Translation and Alters the Association of eIF5A to the Ribosomes
Source: PubMed Central journal article supplement (PMC7369855; doi:10.3390/ijms21134583), 2020-06-27
Supplement: ijms-21-04583-s001.pdf [file ijms-21-04583-s001.pdf]

## Supplementary Materials

### Supplementary figure 1

#### Schematic representation of experimental setup for cell treatments

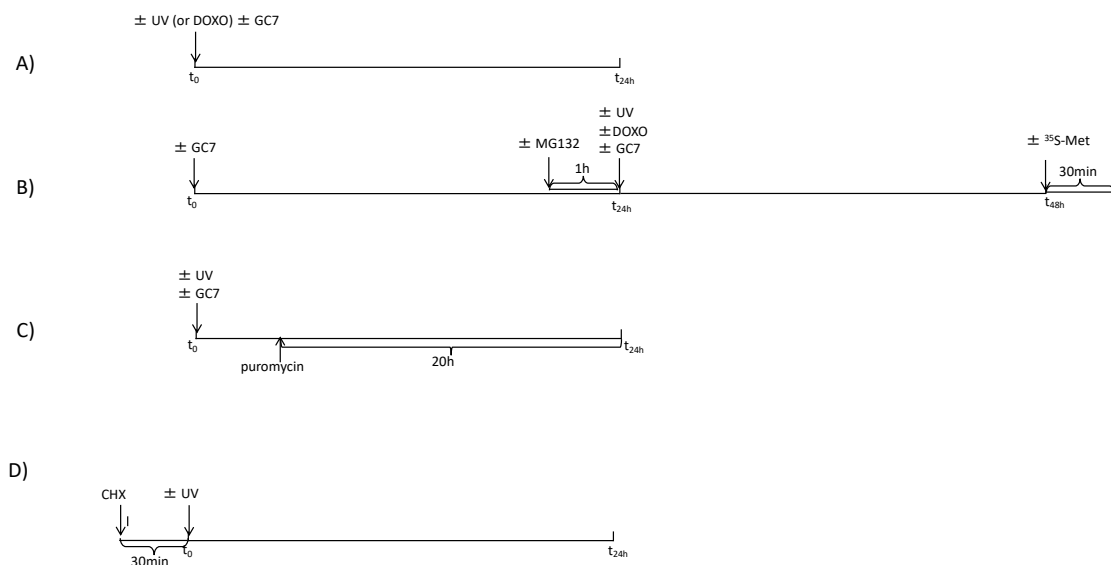

**Figure 1S.** Schematic representation of different cell treatment

### 5.2 Supplementary figure 2

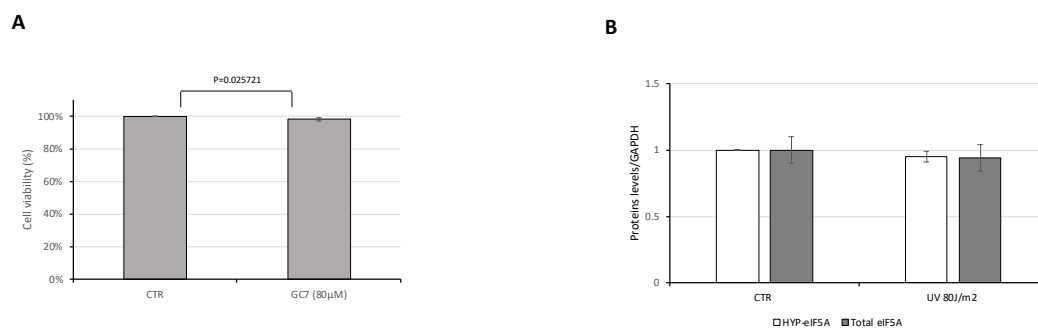

**Figure 2S. A)** Trypan blue cell viability assay. After treatment with GC7 (80  $\mu\text{M}$ ), cell viability was analyzed after 48h of treatment using trypan blue assay. The bar graph shows that GC7 does not affect cell viability, results obtained from three independent experiments. **B)** Total eIF5A and hyp-eIF5A variations in HCT-116 colon cancer cells untreated and UV treated. The HCT-116 cells were treated with UV-C (80 J/m<sup>2</sup>) at 24h. Expression of total eIF5A and eIF5A hypusinated form were detected by western blot analysis. Band density was normalized to control GAPDH.

5.3 Supplementary figure 3

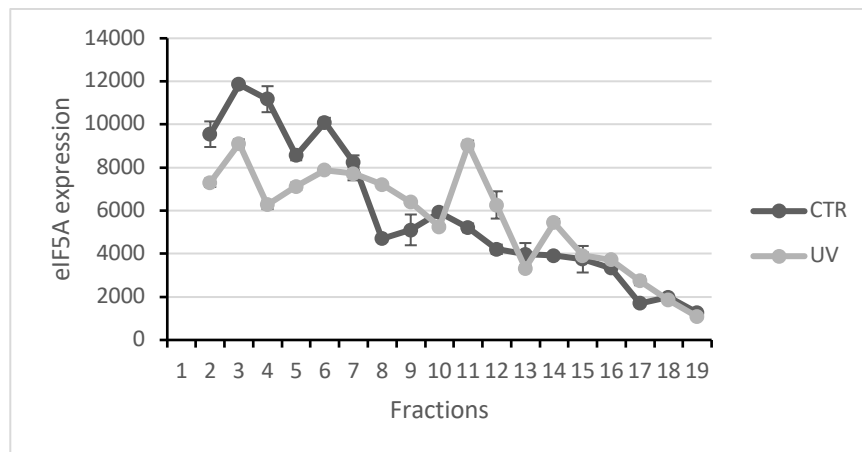

**Figure 3S.** Quantifications of eIF5A found in the polysome fractions were performed and the graphs are shown the protein distribution.
